# Supplementary material for: Tracking and tracing the tobacco industry: potential tobacco industry influence over the EU’s system for tobacco traceability and security features
Source: PubMed Central journal article supplement — Tob Control. 2019 Sep 22;29(e1):e56–62. doi: 10.1136/tobaccocontrol-2019-055094 (PMC7799412; doi:10.1136/tobaccocontrol-2019-055094), 2019-09-22
Supplement: tobaccocontrol-2019-055094supp002.pdf [file tobaccocontrol-2019-055094supp002.pdf]

| <b>Appendix 2: List of respondents to the targeted stakeholder consultation on the implementation of an EU system for traceability and security features<sup>1</sup> whose submissions specifically endorsed SGTIN.</b> |
|-------------------------------------------------------------------------------------------------------------------------------------------------------------------------------------------------------------------------|
| Cimabel vzw/asbl - Cigarette Manufacturers of Belgium and Luxembourg                                                                                                                                                    |
| DHL supply chain                                                                                                                                                                                                        |
| Digital Coding & Tracking Association <sup>2</sup>                                                                                                                                                                      |
| Fixmer Sàrl                                                                                                                                                                                                             |
| GS1 Europe                                                                                                                                                                                                              |
| Heintz Van Landewyck SPRL                                                                                                                                                                                               |
| Imperial Tobacco Limited                                                                                                                                                                                                |
| Japan Tobacco International S.A.                                                                                                                                                                                        |
| J.R. Byrne & Sons Ltd                                                                                                                                                                                                   |
| Lyfra nv                                                                                                                                                                                                                |
| Nightline Group                                                                                                                                                                                                         |
| Philip Morris International                                                                                                                                                                                             |
| Trendy Foods SA – Belgium and Luxembourg                                                                                                                                                                                |
| TVL                                                                                                                                                                                                                     |
| Worldline NV (an Atos company <sup>3</sup> )                                                                                                                                                                            |

[1] European Commission. *Targeted stakeholder consultation on the implementation of an EU system for traceability and security features pursuant to Articles 15 and 16 of the Tobacco Products Directive 2014/40/EU*. 30 Jul 2015.

Available: [https://ec.europa.eu/health/sites/health/files/tobacco/docs/2015\\_tpd\\_co57\\_en.pdf](https://ec.europa.eu/health/sites/health/files/tobacco/docs/2015_tpd_co57_en.pdf) (accessed 22 Jan 2018).

[2] Tobacco Control Research Group. *Digital Coding & Tracking Association (DCTA)*.

TobaccoTactics.org. last modified: Last modified on 19 July 2018. Available:

[https://tobaccotactics.org/index.php?title=Digital\\_Coding\\_%26\\_Tracking\\_Association\\_\(DCTA\)](https://tobaccotactics.org/index.php?title=Digital_Coding_%26_Tracking_Association_(DCTA)) (accessed 8 May 2019).

[3] Tobacco Control Research Group. *Coalition Against Illicit Trade (CAIT)*. Last modified on 19 July 2018.

Available: [http://tobaccotactics.org/index.php?title=Coalition\\_Against\\_Illicit\\_Trade\\_\(CAIT\)](http://tobaccotactics.org/index.php?title=Coalition_Against_Illicit_Trade_(CAIT)) (accessed 20 February 2019).
